# Supplementary material
Source: PubMed Central journal article supplement (PMC1630449)
Supplement: pgen.0020168.sg008.pdf [file pgen.0020168.sg008.pdf]

assembly tGtcaGctgaaatGatGggCgtagacGcaCgtcagcGgCggaaatGgtttctatcaaaatGaaagtGtttagagattttcctcaaGtttcaaatGaGgcgaatccc  
human tGtcaGctgaaatGatGggCgtagacGcaCgtcagcGgCggaaatGgtttctatcaaaatGaaagtGtttagagattttcctcaaGtttcaaatGaGgcgaatccc  
chimp tAtcaActgaaatTatAggTgtagacAcaTgtcagcAgTggaaatAgtttctatcaaaatTaaagtAtttagagattttcctcaaAttcaaatTaTgcgaatccc  
gorilla tAtcaActgaaatTatAggTgtagacAcaTgtcagcAgTggaaatAgtttctatcaaaatTaaagtAtttagagattttcctcaaAttcaaatTaTgcgaatccc  
orang tAtcaActgaaatTatAggTgtagacAcaTgtcagcAgTggaaatAgtttctatcaaaatTaaagtAtttagagattttcctcaaAttcaaatTaTgcgaatccc  
macaque tAtcaGctgaaatTatAggTgtagacAcaTgtcagcAgTggaaatAgtttctatcaaaatTaaagtAtttagagattttcctcaaAttcaaatTaTgcgaatccc

HAR2

assembly ttCcgcaaatagggcaCccacaGtaacaCgtgtgGcGcCGaccocgctgGCaatcggggctttataCgattgCtggagatgctgacagctcaattaaagtgt  
human ttCcgcaaatagggcaCccacaGtaacaCgtgtgGcGcCGaccocgctgGCaatcggggctttataCgattgCtggagatgctgacagctcaattaaagtgt  
chimp ttTcgcaaatagggcaTccacaAtaacaAggtgtTcAcTAaccocgctgGCaatcggggctttataGgattgCtggagatgctgacagctcaattaaagtgt  
gorilla ttTcgcaaatagggcaTccacaAtaacaAggtgtTcAcTAaccocgctgGCaatcggggctttataGgattgCtggagatgctgacagctcaattaaagtgt  
orang ttTcgcaaatagggcaTccacaAtaacaAggtgtTcAcTAaccocgctgGCaatcggggctttataGgattgCtggagatgctgacagctcaattaaagtgt  
macaque ttTcgcaaatagggcaTccacaAtaacaAggtgtTcAcTAaccocgctgGCaatcggggctttataGgattgTtggagatgctgacagctcaattaaagtgt  
spider ttTcgcaaatagggcaTccacaAtaacaAggtgtTcAcTAaccocgctgGCaatcggggctttataGgattgTtggagatgctgacagctcaattaaagtgt

assembly acccttTgtGccc  
human acccttTgtGccc  
chimp acccttTgtAccc  
gorilla acccttTgtAccc  
orang acccttTgtAccc  
macaque acccttTgtAccc  
spider acccttTgtAccc

HAR3

assembly ttctcccagctcaggaaggatCtCaaggGcttcaagcagcctgggttccaattaagccCgtgtgaccaccccagggatgcCagaaCattcctgattaaacaagagg  
human ttctcccagctcaggaaggatCtCaaggGcttcaagcagcctgggttccaattaagccCgtgtgaccaccccagggatgcCagaaCattcctgattaaacaagagg  
chimp ttctcccagctcaggaaggatTtAaaggActtcaagcagcctgggttccaattaagccAggtgtgaccaccccagggatgcTagaaTattcctgattaaacaagagg  
orang ttctcccagctcaggaaggatTtAaaggActtcaagcagcctgggttccaattaagccAggtgtgaccaccccagggatgcTagaaTattcctgattaaacaagagg  
macaque ttctcccagctcaggaaggatTAAaaggActtcaagcagcctgggttccaattaagccAggtgtgaccaccccagggatgcTagaaTattcctgattaaacaagagg

HAR4

assembly gcagcttttgtgtcagaccTtacctgaaaGtaCgcagtaagctgggtaattttatttacTtttt-ggtgattatttttatgattttatCatcaTattcaAtgattc  
human gcagcttttgtgtcagaccTtacctgaaaGtaCgcagtaagctgggtaattttatttacTtttt-ggtgattatttttatgattttatCatcaTattcaAtgattc  
chimp gcagcttttgtgtcagaccCtacctgaaaAtaAgcagtaagctgggtaattttatttacCtttt-ggtgattatttttatgattttatGatcaTattcaAtgattc  
gorilla gcagcttttgtgtcagaccCtacctgaaaAtaAgcagtaagctgggtaattttatttacCtttt-ggtgattatttttatgattttatGatcaTattcaAtgattc  
orang gcagcttttgtgtcagaccCtacctgaaaAtaAgcagtaagctgggtaattttatttacCtttt-ggtgattatttttatgattttatGatcaTattcaAtgattc  
macaque gcagcttttgtgtcagaccCtacctgaaaAtaAgcagtaagctgggtaattttatttacCtttt-ggtgattatttttatgattttatGatcaTattcaAtgattc  
spider gcagcttttgtgtcagaccCtacctgaaaAtaAgcagtaagctgggtaattttatttacCtttt-ggtgattatttttatgattttatTatcaTattcaGtgattc  
lemur gcagcttttgtgtcagaccCtacctgaaaAtaAgcagtaagctgggtaattttatttacCtttt-ggtgattatttttatgattttatGatcaGattcaAtgattc

assembly ataacattggcctg  
human ataacattggcctg  
chimp ataacattggcctg  
gorilla ataacattggcctg  
orang ataacattggcctg  
macaque ataacattggcctg  
spider ataacattggcccg  
lemur ataacattggcctg

HAR5

assembly tgtacttttgtttattttgttttcaCagtactgtgttttcatgtgtgtgtTtGtTtGtGtGagcctcgtcgtggccgtagcatgtcggtttgtgttccc-atic  
human tgtacttttgtttattttgttttcaCagtactgtgttttcatgtgtgtgtTtGtTtGtGtGagcctcgtcgtggccgtagcatgtcggtttgtgttccc-atic  
chimp tgtacttttgtttattttgttttcaAagtactgtgttttcatgtgtgtgtTtGtTtCtGtTAgcctcgtcgtggccgtagcatgtcggtttgtgttcccCatic  
gorilla tgtacttttgtttattttgttttcaAagtactgtgttttcatgtgtgtgtTtGtTtCtGtTAgcctcgtcgtggccgtagcatgtcggtttgtgttcccCatic  
orang tgtacttttgtttattttgttttcaAagtactgtgttttcatgtgtgtgt-t-ttCtGt-tt-AgcctcgtcgtggccgtagcatgtcggtttgtgttcccCatic  
macaque tgtacttttgtttattttgttttcaAagtactgtgttttcatgtgtgtgtTtGtTtCtGtTAgcctcgtcgtggccgtagcatgtcggtttgtgttcccCatic

assembly tttctgctgttGcctctGtgtcccgcacatctcccagtgctc-ttccaccccAccGccagtActgtctgcaacctctttctcctccctcctTcggactgcccc-ga  
human tttctgctgttGcctctGtgtcccgcacatctcccagtgctc-ttccaccccAccGccagtActgtctgcaacctctttctcctccctcctCcgactgcccc-ga  
chimp tttctgctgttCccctctCtgtcccgcacatctcccagtgctc-ttccaccccAccAccagtGctgtctgcaacctctttctcctccctcctTcggactgccccTga  
gorilla tttctgctgttCccctctCtgtcccgcacatctcccagtgctc-ttccaccccAccAccagtGctgtctgcaacctctttctcctccctcctTcggactgccccTga  
orang tttctgctgttCccctctCtgtcccgcacatctcccagtgctc-ttccaccccAccAccagtGctgtctgcaacctctttctcctccctcctTcggactgccccTga  
macaque tttctgctgttCccctctCtgtcccgcacatctcccagtgctc-ttccaccccAccAccagtGctgtctgcaacctctttctcctccctcctTcggactgccccTga

assembly gaaaacttttgccGaaaagctttctaagcattggagagtgtcctgcctatgcaactctgctctcagCgcaagcaccgacgctccagcctgccttccctctttgtc  
human gaaaacttttgccGaaaagctttctaagcattggagagtgtcctgcctatgcaactctgctctcagCgcaagcaccgacgctccagcctgccttccctctttgtc  
chimp gaaaacttttgccGaaaagctttctaagcattggagagtgtcctgcctatgcaactctgctctcagCgcaagcaccgacgctccagcctgccttccctctttgtc  
gorilla gaaaacttttgccGaaaagctttctaagcattggagagtgtcctgcctatgcaactctgctctcagCgcaagcaccgacgctccagcctgccttccctctttgtc  
orang gaaaacttttgccGaaaagctttctaagcattggagagtgtcctgcctatgcaactctgctctcagCgcaagcaccgacgctccagcctgccttccctctttgtc  
macaque gaaaacttttgccGaaaagctttctaagcattggagagtgtcctgcctatgcaactctgctctcagCgcaagcaccgacgctccagcctgccttccctctttgtc

assembly agtactgtatgtaactgtaaaactctgacaa  
human agtactgtatgtaactgtaaaactctgacaa  
chimp agtactgtatgtaactgtaaaactctgacaa  
gorilla agtactgtatgtaactgtaaaactctgacaa  
orang agtactgtatgtaactgtaaaactctgacaa  
macaque agtactgtatgtaactgtaaaactctgacaa
