# Supplementary material
Source: PubMed Central journal article supplement (PMC1630449)
Supplement: pgen.0020168.st003.pdf [file pgen.0020168.st003.pdf]

|                  | Number of human diffs |       |     |     |     |     |
|------------------|-----------------------|-------|-----|-----|-----|-----|
|                  | > 0                   | > 1   | > 2 | > 3 | > 4 | > 5 |
| Number of Blocks | 8,189                 | 1,663 | 363 | 75  | 16  | 5   |

**Table S3. Distribution of human-specific changes in conserved blocks.** Counts of the number of conserved blocks (out of 34,498) with more than 0-5 human diffs. Human diffs are sites where the chimp, mouse and rat bases are identical, but the human base is different (Text S1.1).
