# Supplementary material
Source: PubMed Central journal article supplement (PMC1630449)
Supplement: pgen.0020168.st004.pdf [file pgen.0020168.st004.pdf]

| <b>HAR</b> | <b>Observed score (<i>S</i>)</b> | <b><i>p</i>-value</b> |
|------------|----------------------------------|-----------------------|
| HAR97      | 2.50                             | 0.001                 |
| HAR1       | 5.50                             | 0.005                 |
| HAR188     | 1.25                             | 0.007                 |
| HAR17      | 1.25                             | 0.011                 |
| HAR33      | 0.50                             | 0.020                 |
| HAR155     | 0.75                             | 0.022                 |
| HAR41      | 0.25                             | 0.024                 |
| HAR73      | 0.75                             | 0.030                 |
| HAR27      | 0.50                             | 0.035                 |
| HAR69      | 1.25                             | 0.037                 |
| HAR78      | 0.50                             | 0.041                 |
| HAR190     | 0.25                             | 0.042                 |

**Table S4. HARs with significant RNA secondary structure.** Observed Score (*S*) is a linear combination of counts of different types of substitutions (Text S1.12). P-values are computed empirically by shuffling the columns of the multiple alignment as described in Pedersen *et al.*<sup>37</sup> (not adjusted for multiple comparisons).
