# Supplementary material
Source: PubMed Central journal article supplement (PMC1630449)
Supplement: pgen.0020168.st005.pdf [file pgen.0020168.st005.pdf]

|                            | <b>HAR1</b> | <b>HAR2</b> | <b>HAR3</b> | <b>HAR4</b> | <b>HAR5</b> | <b>Total</b> |
|----------------------------|-------------|-------------|-------------|-------------|-------------|--------------|
| <i>Substitution Rates</i>  |             |             |             |             |             |              |
| <b>Human:Chimp</b>         | 3.56        | 12.25       | 12.93       | 17.33       | 10.21       | 7.24         |
| <b>Human:(Chimp-Mouse)</b> | 76.45       | 50.32       | 46.08       | 20.17       | 9.27        | 25.87        |

**Table S5. Comparison of estimated substitution rates in HAR1-HAR5.** Substitution rates are posterior expected value of the number of substitutions using the method described in Siepel *et al.*<sup>38</sup> with the CONS model as prior. The human:chimp ratio is the estimated number of substitutions per site in human compared to chimp. The human:(chimp-mouse) ratio is the estimated number of substitutions per site per million years in human compared to the chimp-mouse phylogeny. Note that because rodent generation times are much shorter than human, we expect the rates in years to be *smaller* in human than in the chimp-mouse if the regions are evolving at the same rate per generation. Branch lengths for scaling rates in millions of years: human=5my, chimp-mouse=150my. Totals computed by concatenating the five elements.
