# Supplementary material
Source: PubMed Central journal article supplement (PMC1630449)
Supplement: pgen.0020168.st006.pdf [file pgen.0020168.st006.pdf]

|                  | <b>HAR1</b>  | <b>HAR2</b>  | <b>HAR3</b> | <b>HAR4</b> | <b>HAR5</b> |
|------------------|--------------|--------------|-------------|-------------|-------------|
| <i>4d sites</i>  |              |              |             |             |             |
| <b>All</b>       | $3.3e^{-14}$ | $4.7e^{-11}$ | $8.3e^{-5}$ | $1.2e^{-3}$ | $5.5e^{-4}$ |
| <b>Last Band</b> | $2.4e^{-12}$ | $1.8e^{-9}$  | $4.7e^{-4}$ | $4.9e^{-3}$ | $4.8e^{-3}$ |

**Table S6. Significance of human acceleration.** Wright-Fisher independent sites model  $p$ -values for human substitutions compared to the genome-wide human-chimp background rate based on ENCODE region<sup>39</sup> 4d sites and the human background rate in 4d sites of ENCODE regions in final chromosome bands. Unadjusted  $p$ -values are reported.
