# Supplementary material
Source: PubMed Central journal article supplement (PMC1630449)
Supplement: pgen.0020168.st007.pdf [file pgen.0020168.st007.pdf]

|                            | <b>HAR1</b> | <b>HAR2</b> | <b>HAR3</b> | <b>HAR4</b> | <b>HAR5</b> |
|----------------------------|-------------|-------------|-------------|-------------|-------------|
| <i>Index of dispersion</i> |             |             |             |             |             |
| <b>unweighted</b>          | 2.38        | 3.60        | 1.91        | 3.32        | 22.08       |
| <b><i>p</i>-value</b>      | 0.024       | 0.0063      | 0.057       | 0.14        | 0.89        |
|                            |             |             |             |             |             |
| <b>weighted</b>            | 11.28       | 13.75       | 6.95        | 5.90        | 8.26        |
| <b><i>p</i>-value</b>      | 0.087       | 0.024       | 0.14        | 0.029       | 0.00        |

**Table S7. Index of dispersion in HAR1-HAR5.** Weighted index of dispersion computed using the method of Gillespie<sup>27</sup> P-values computed by simulation (not adjusted for multiple comparisons).
