# Supplementary material
Source: PubMed Central journal article supplement (PMC1630449)
Supplement: pgen.0020168.st008.pdf [file pgen.0020168.st008.pdf]

|                          |       | <b>HAR1</b> | <b>HAR2</b> | <b>HAR3</b> | <b>HAR4</b> | <b>HAR5</b> |
|--------------------------|-------|-------------|-------------|-------------|-------------|-------------|
| <i>Standard neutral</i>  |       |             |             |             |             |             |
| <b>1Kb</b>               | n=10  | 0.01981     | 0.08308     | 0.75312     | 0.99231     | 0.72593     |
|                          | n=50  | 0.00433     | 0.06367     | 0.77749     | 0.97381     | 0.73229     |
|                          | n=100 | 0.00241     | 0.06628     | 0.80073     | 0.96101     | 0.73589     |
| <b>5Kb</b>               | n=10  | 0.04668     | 0.00491     | 0.66538     | 1.00000     | 0.49262     |
|                          | n=50  | 0.00475     | 0.00035     | 0.71500     | 1.00000     | 0.48233     |
|                          | n=100 | 0.00152     | 0.00015     | 0.74426     | 1.00000     | 0.48350     |
| <b>10Kb</b>              | n=10  | 0.49164     | 0.39595     | 0.16318     | 1.00000     | 0.67670     |
|                          | n=50  | 0.45388     | 0.34431     | 0.06142     | 1.00000     | 0.72524     |
|                          | n=100 | 0.42251     | 0.36917     | 0.05721     | 1.00000     | 0.74191     |
| <i>Recent expansion</i>  |       |             |             |             |             |             |
| <b>1Kb</b>               | n=10  | 0.00656     | 0.06680     | 0.72848     | 0.61229     | 0.72620     |
|                          | n=50  | 0.00073     | 0.06078     | 0.82650     | 0.43900     | 0.80345     |
|                          | n=100 | 0.00112     | 0.05803     | 0.83592     | 0.34701     | 0.68332     |
| <b>5Kb</b>               | n=10  | 0.01105     | 0.00214     | 0.63092     | 0.95413     | 0.52108     |
|                          | n=50  | 0.01060     | 0.00017     | 0.76901     | 0.75883     | 0.61696     |
|                          | n=100 | 0.00037     | 0.00011     | 0.78050     | 0.55511     | 0.61425     |
| <b>10Kb</b>              | n=10  | 0.26667     | 0.34493     | 0.12145     | 0.84908     | 0.68131     |
|                          | n=50  | 0.22139     | 0.37124     | 0.06795     | 0.38839     | 0.82961     |
|                          | n=100 | 0.38992     | 0.34466     | 0.04269     | 0.14957     | 0.84986     |
| <i>Ancient expansion</i> |       |             |             |             |             |             |
| <b>1Kb</b>               | n=10  | 0.02351     | 0.08975     | 0.84984     | 0.77039     | 0.63095     |
|                          | n=50  | 0.00307     | 0.06582     | 0.87187     | 0.54836     | 0.75420     |
|                          | n=100 | 0.00131     | 0.06184     | 0.87523     | 0.51468     | 0.77742     |
| <b>5Kb</b>               | n=10  | 0.03977     | 0.00189     | 0.80463     | 0.99711     | 0.36589     |
|                          | n=50  | 0.00183     | 0.00008     | 0.84652     | 0.96960     | 0.48632     |
|                          | n=100 | 0.00015     | 0.00006     | 0.72705     | 0.87804     | 0.52350     |
| <b>10Kb</b>              | n=10  | 0.65032     | 0.50698     | 0.19286     | 0.99066     | 0.53724     |
|                          | n=50  | 0.64041     | 0.42026     | 0.01294     | 0.71901     | 0.75664     |
|                          | n=100 | 0.52263     | 0.39300     | 0.01083     | 0.62670     | 0.81869     |
| <i>Bottleneck</i>        |       |             |             |             |             |             |
| <b>1Kb</b>               | n=10  | 0.03071     | 0.05847     | 0.86146     | 0.27896     | 0.83247     |
|                          | n=50  | 0.00135     | 0.06354     | 0.89160     | 0.29777     | 0.85703     |
|                          | n=100 | 0.00106     | 0.04441     | 0.83491     | 0.24584     | 0.80315     |
| <b>5Kb</b>               | n=10  | 0.03936     | 0.00003     | 0.83600     | 0.37603     | 0.65098     |
|                          | n=50  | 0.00005     | 0.00002     | 0.89848     | 0.42068     | 0.71374     |
|                          | n=100 | 0.00007     | <0.00001    | 0.78958     | 0.27764     | 0.57119     |
| <b>10Kb</b>              | n=10  | 0.97675     | 0.34636     | 0.03201     | 0.07156     | 0.90889     |
|                          | n=50  | 0.67266     | 0.39456     | 0.02863     | 0.07313     | 0.95952     |
|                          | n=100 | 0.68356     | 0.22591     | 0.00668     | 0.02365     | 0.88843     |

**Table S8. Selective sweep test  $p$ -values.** Significance of the observed pattern of polymorphism and divergence for each HAR compared to the surrounding 1Mb. Coalescent-based simulations were performed with four demographic models: the standard neutral model, a model with a recent population expansion, a model with an ancient population expansion, and a model with a population bottleneck followed by expansion. For each HAR, a separate analysis was conducted under each model at each combination of three scales (windows of size 1Kb, 5Kb, and 10Kb) and three sample sizes ( $n = 10, 50, 100$ ) as described in Text S1.10. The  $p$ -values are the proportion of the  $10^5$  simulated data sets that have the observed number or fewer segregating sites, conditional on the observed human-chimp divergence and the speciation time estimated from the surrounding 1Mb regions. Unadjusted  $p$ -values are reported.
