# Supplementary material
Source: PubMed Central journal article supplement (PMC1630449)
Supplement: pgen.0020168.st009.pdf [file pgen.0020168.st009.pdf]

|                          | <b>HAR1</b> | <b>HAR2</b> | <b>HAR3</b> | <b>HAR4</b> | <b>HAR5</b> |
|--------------------------|-------------|-------------|-------------|-------------|-------------|
| <b>Chromosome</b>        | chr20       | chr2        | chr7        | chr16       | chr12       |
| <b>Start</b>             | 61,203,891  | 23,655,6008 | 1,979,165   | 71,686,758  | 844,433     |
| <b>Length</b>            | 187 bp      | 155 bp      | 295 bp      | 463 bp      | 418 bp      |
| <i>Human Differences</i> |             |             |             |             |             |
| <b>W → S</b>             | 23          | 11          | 10          | 6           | 4           |
| <b>S → W</b>             | 0           | 0           | 0           | 3           | 1           |
| <b>neither</b>           | 2           | 1           | 1           | 2           | 3           |
| <b>Human:Chimp</b>       | 12.97       | 23.08       | 26.62       | 37.53       | 12.79       |

**Table S9. Details of phastCons elements containing HAR1-HAR5.** Coordinates are from hg17 human genome assembly (build 35). Human differences gives the number of bases that do not match the human-chimp-macaque consensus ancestral sequence. The human:chimp ratio is the estimated substitutions rate per million years in human compared to chimp. Rates are estimated using the method described in Siepel *et al*<sup>38</sup>. with the CONS model as prior (Text S1).
