# Supplementary material
Source: PubMed Central journal article supplement (PMC1630449)
Supplement: pgen.0020168.st010.pdf [file pgen.0020168.st010.pdf]

| Name | Forward primer          | Reverse primer       | Size (bp) | Primates amplified |
|------|-------------------------|----------------------|-----------|--------------------|
| HAR1 | gctgacagggttcgaaagag    | ttgctgtcctgcttcttct  | 429       | H                  |
| HAR1 | ccctgttctcccctcttttc    | agagaccctgagtcgcagtc | 280       | C,G,O              |
| HAR1 | tgtaatcagccgctaagacg    | caataaaatccccgtgctg  | 275       | M                  |
| HAR2 | agccagacctaattgtgaacc   | ggccgattctggatctttaa | 666       | H,C,G,O,M,S        |
| HAR3 | tgtccatccagacctcg       | gcctgcttgtgtgtggttg  | 721       | H,C,O,M            |
| HAR4 | ctgggctaattaagcagactgag | agttgcccggtatcaatcct | 398       | H,C,G,O,M,S,L      |
| HAR5 | tgtcagatgtgctatgttgag   | tgtgccaaggacattatagg | 652       | H,C,G,O,M          |

**Table S10. Resequencing primers.** Details of the primers used in this study. H=human, C=chimpanzee, M=macaque, G=gorilla, O=orangutan, S=spider monkey, L=lemur.
