# Supplementary material
Source: PubMed Central journal article supplement (PMC1630449)
Supplement: pgen.0020168.st011.pdf [file pgen.0020168.st011.pdf]

|             | <b>Human Diffs</b> | <b>Low Quality Human Diffs</b> | <b>Additional Polymorphisms</b> |
|-------------|--------------------|--------------------------------|---------------------------------|
| <b>HAR1</b> | 10/10              | 2/2                            | 0                               |
| <b>HAR2</b> | 8/8                | 4/4                            | 0                               |
| <b>HAR3</b> | 5/5                | 1/1                            | 0                               |
| <b>HAR4</b> | 5/5                | 0/0                            | 0                               |
| <b>HAR5</b> | 7/8                | 0/0                            | 2                               |

**Table S11. PDR panel sequencing results.** Resequencing of the 24-member subset of the NHGRI Polymorphism Discovery Resource Panel<sup>41</sup>. Nearly all human-specific substitutions are fixed in the panel, including all low quality human diffs (Text S1.1).
