# Supplementary material
Source: PubMed Central journal article supplement (PMC1630449)

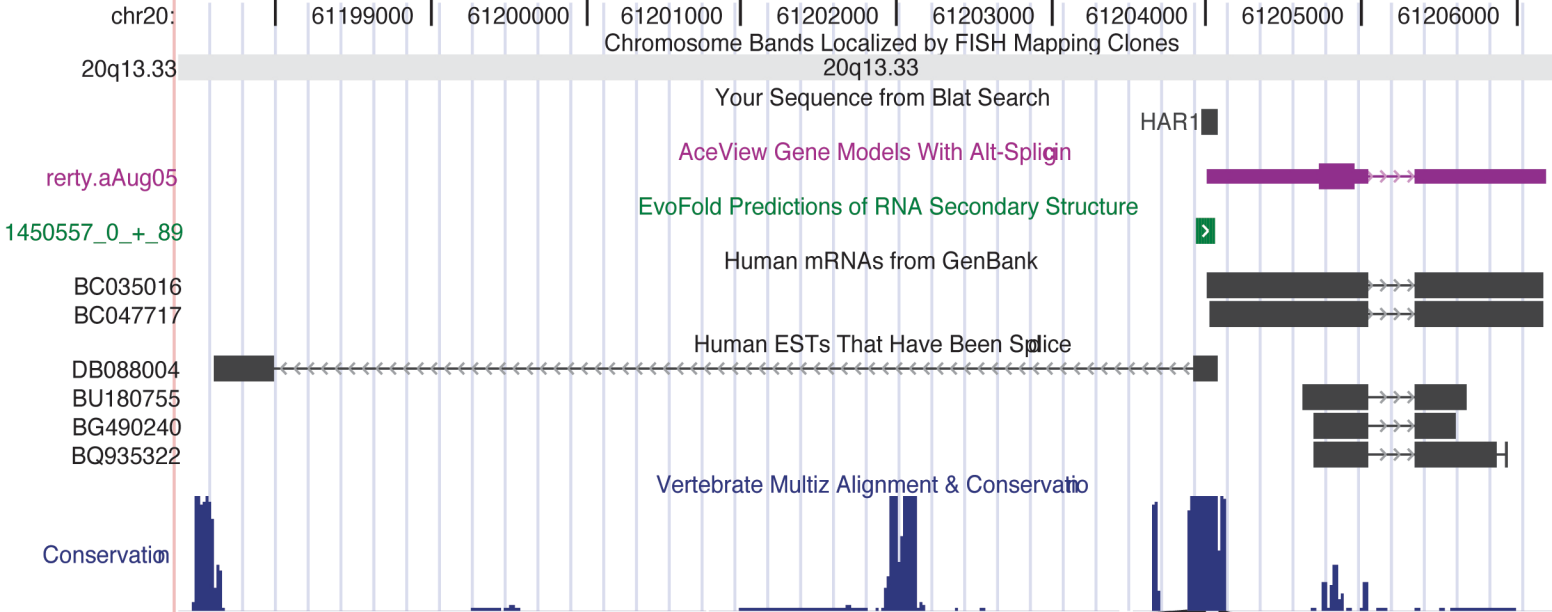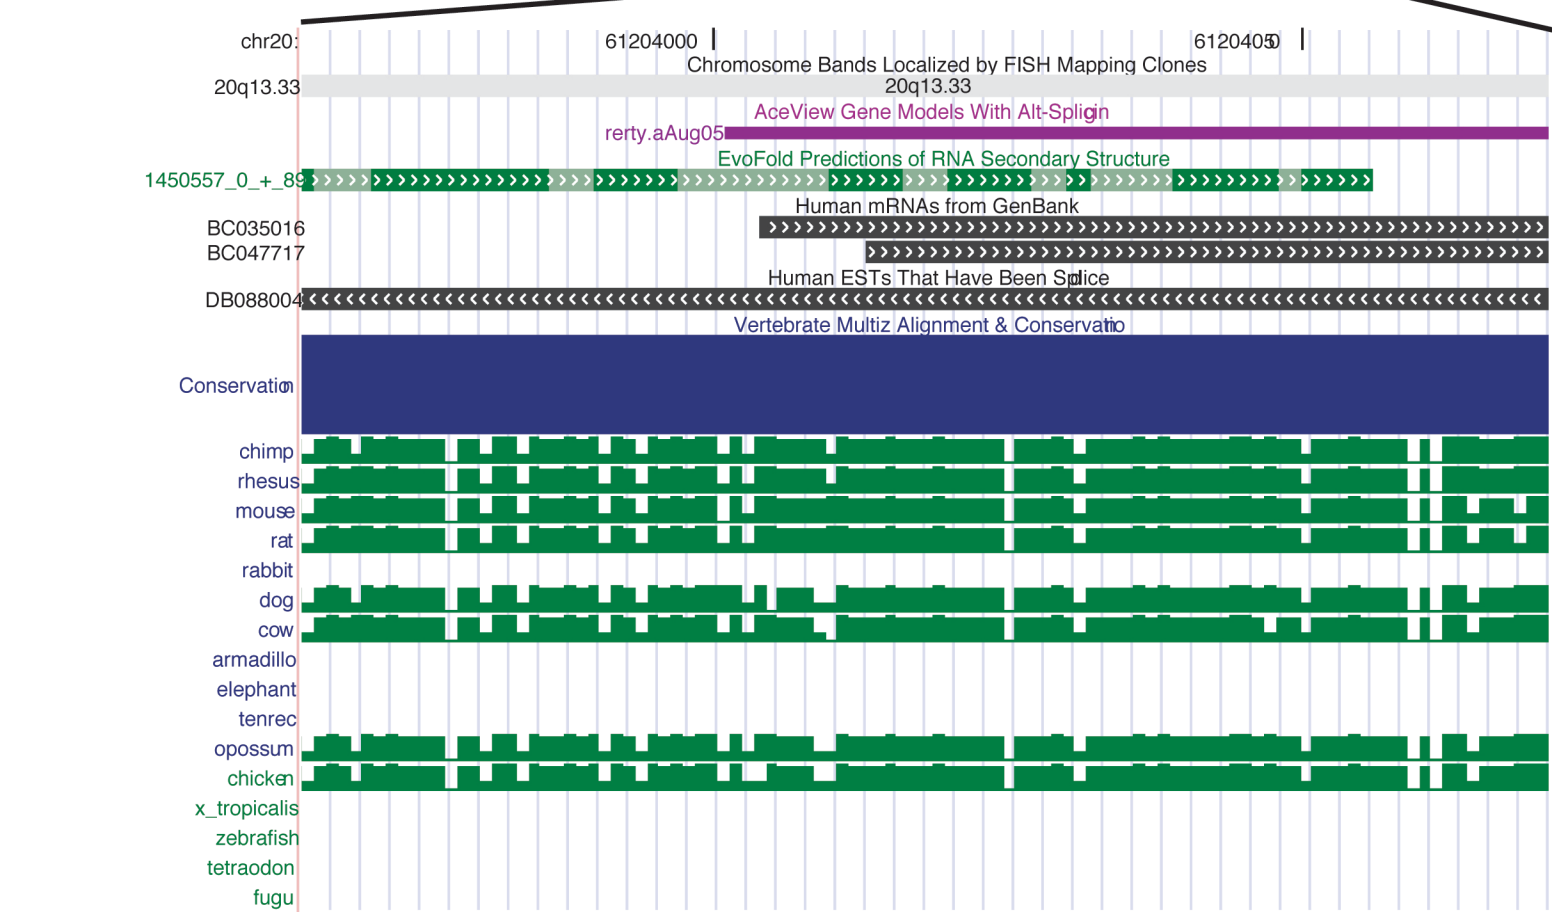

Supplement: pgen.0020168.sg003.pdf [file pgen.0020168.sg003.pdf]

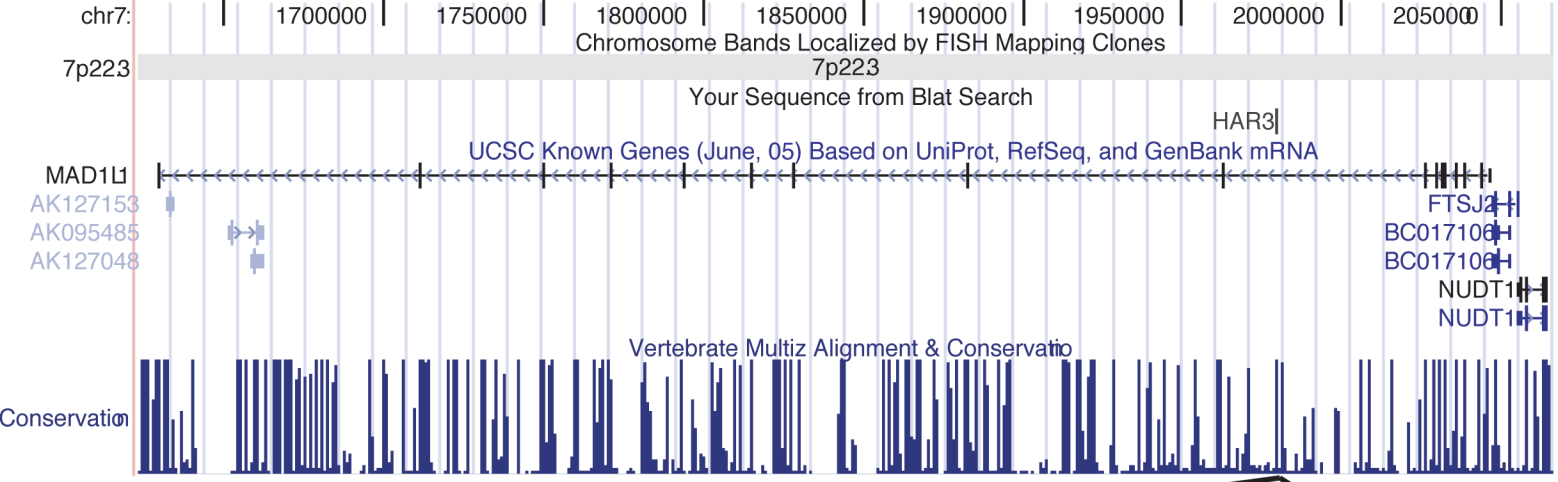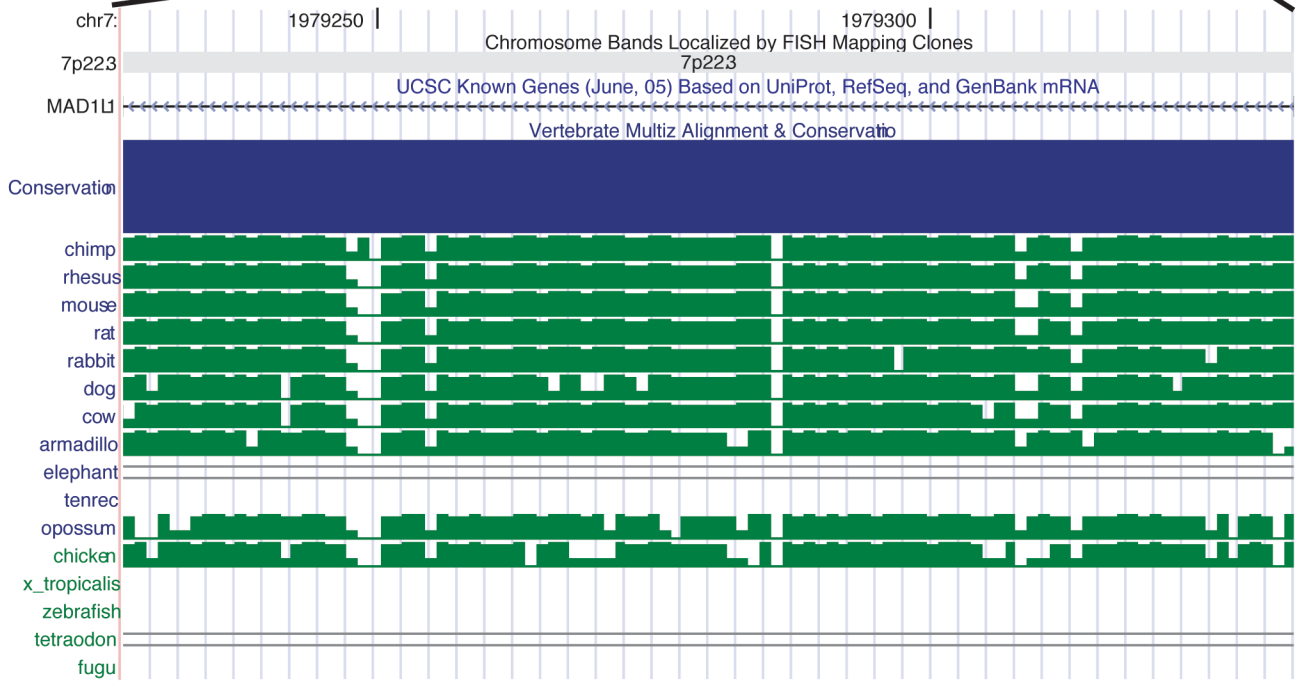

Supplement: pgen.0020168.sg005.pdf [file pgen.0020168.sg005.pdf]

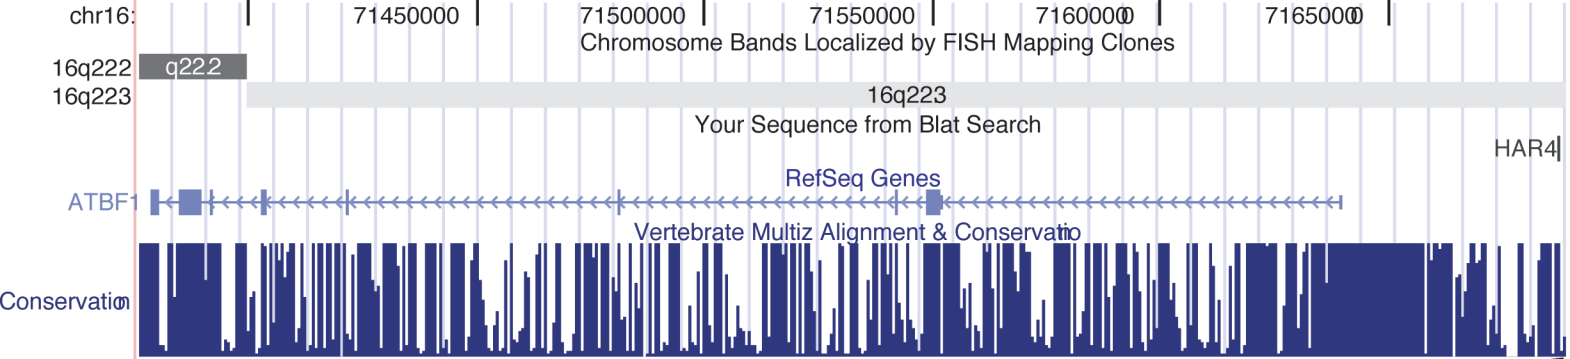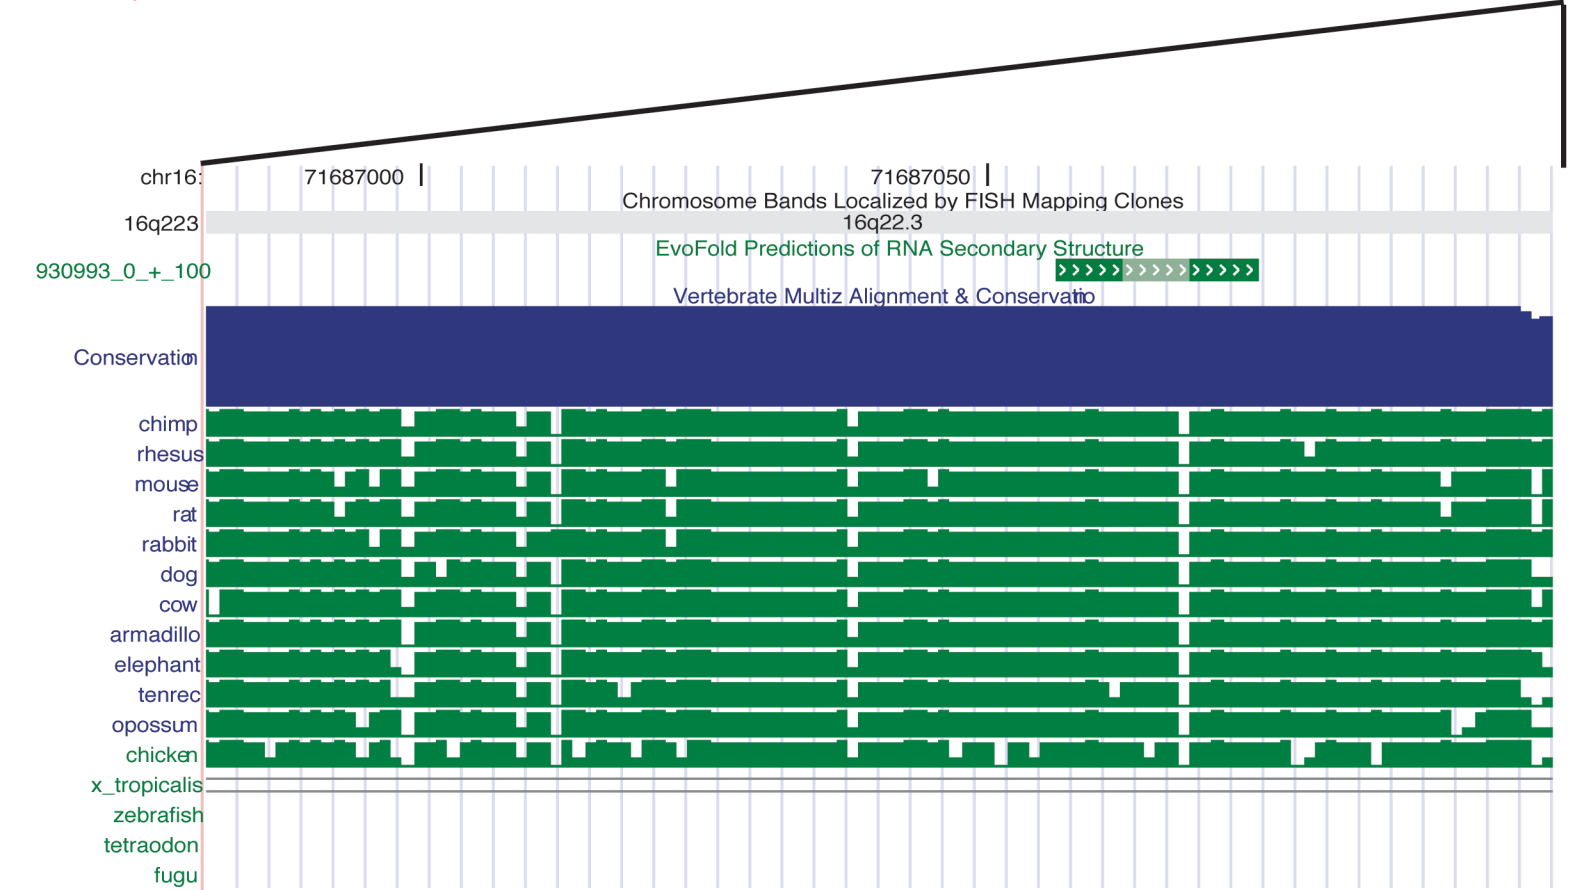

Supplement: pgen.0020168.sg006.pdf [file pgen.0020168.sg006.pdf]

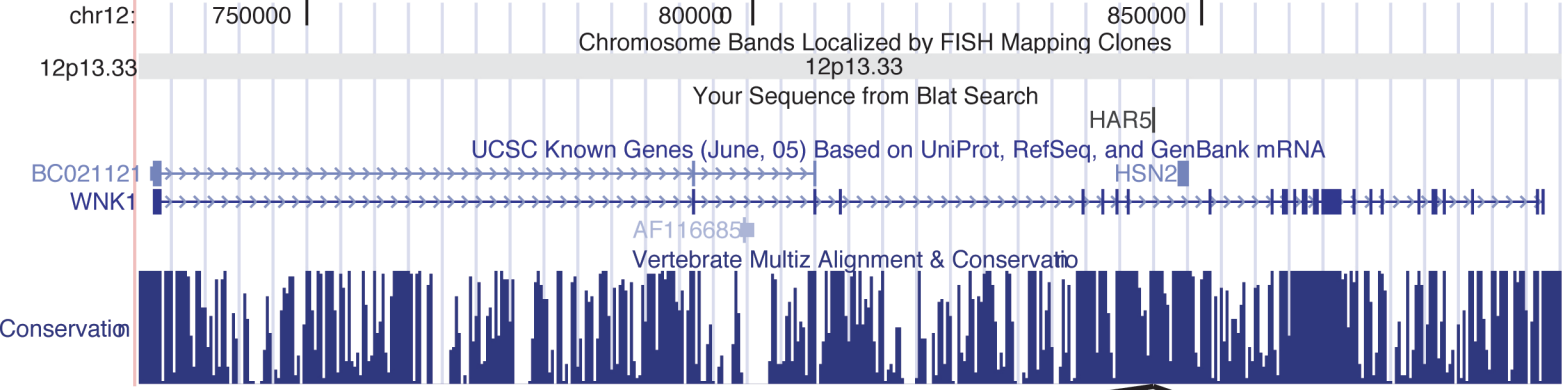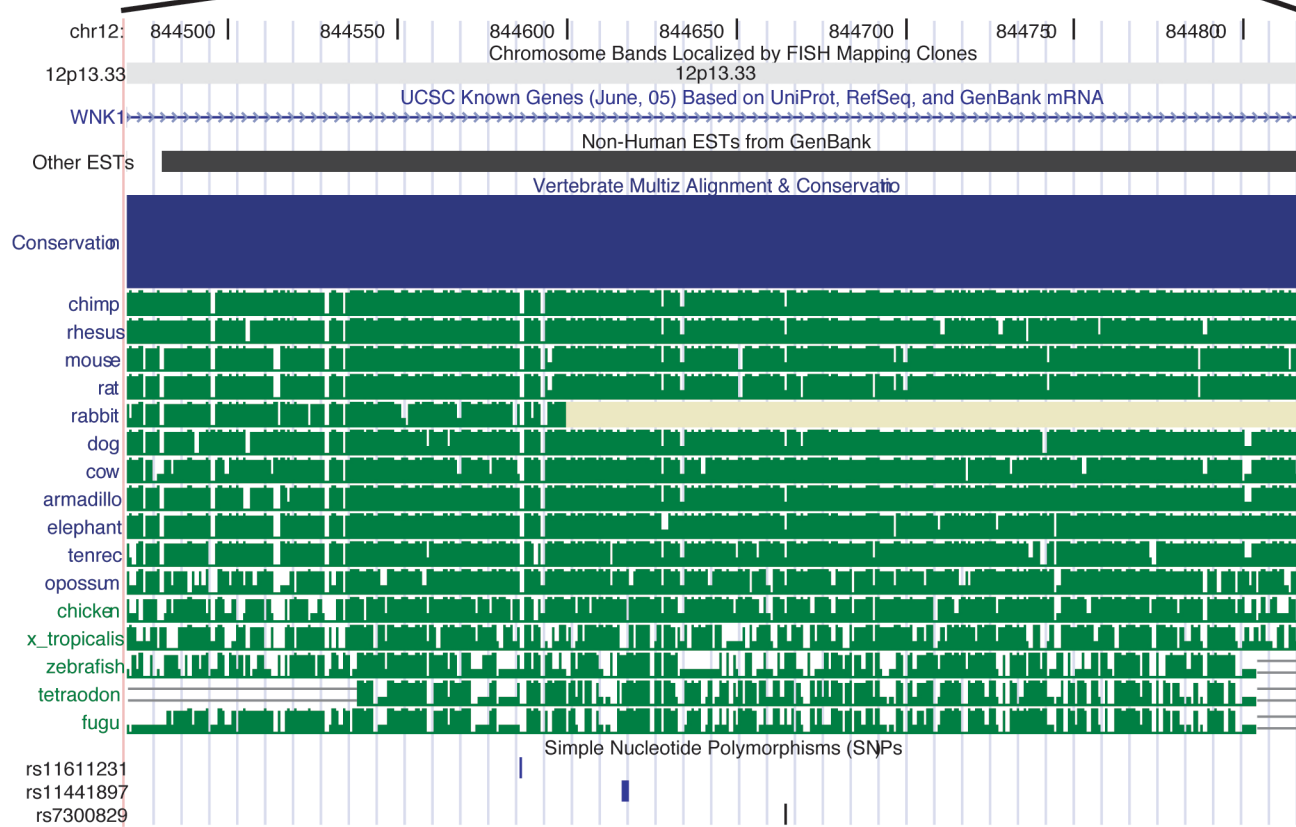

Supplement: pgen.0020168.sg007.pdf [file pgen.0020168.sg007.pdf]
